# Supplementary material for: Collagen stimulation of platelets induces a rapid spatial response of cAMP and cGMPsignaling scaffolds
Source: Royal Society of Chemistry journal article supplement (doi:10.1039/c1mb05145h), 2011-01-07
Supplement: c1mb05145h.pdf [file c1mb05145h.pdf]

## SUPPLEMENTARY FIGURES

### Collagen stimulation of platelets induces rapid spatial reorganizations in 5 cAMP and cGMP signaling scaffolds†

Luigi Margarucci,<sup>a,b,c</sup> Thijs C. van Holten,<sup>d</sup> Christian Preisinger,<sup>a,b</sup> Onno B. Bleijerveld,<sup>a,b</sup> Mark Roest,<sup>d</sup>  
Albert J.R. Heck\*<sup>a,b</sup> and Arjen Scholten\*<sup>a,b</sup>

10

<sup>a</sup> Biomolecular Mass Spectrometry and Proteomics Group, Bijvoet Center for Biomolecular Research and Utrecht  
Institute for Pharmaceutical Sciences, Utrecht University, Padualaan 8, 3584 CH Utrecht, The Netherlands

<sup>b</sup> Netherlands Proteomics Centre, Padualaan 8, 3584 CH Utrecht, The Netherlands

15 <sup>c</sup>Department of Biomedical and Pharmaceutical Sciences University of Salerno, Via Ponte don Melillo 84084 Fisciano,  
Italy

<sup>d</sup> Department of Clinical Chemistry and Haematology, University Medical Centre Utrecht, Heidelberglaan 100, 3584 CX  
Utrecht, The Netherlands

20

25

30

35

40

**Supplementary figure 1.** Tandem MS-spectrum of human PDE5A (O76074) peptide ADNSVPGTPTR (89-99) with the Ser at position 4 being phosphorylated (top panel) or not (bottom panel). Data from a qualitative analysis. Ion intensities of similar b/y-ions indicate such as y6, b5 etc. are indicative of this peptide. A neutral loss series on the b-ions localize Ser92 as being 5 phosphorylated.

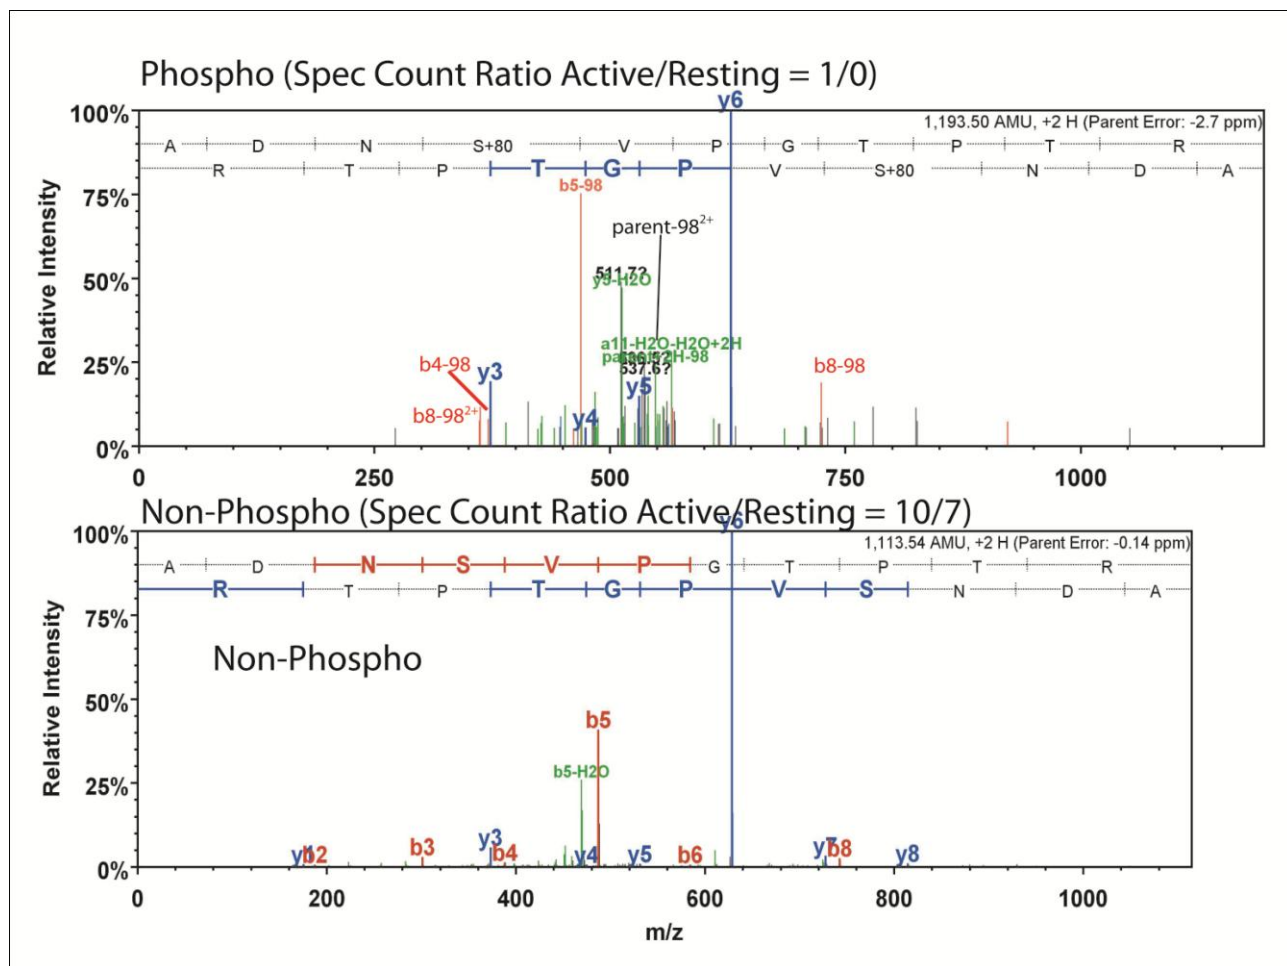

**Supplementary figure 2.** Protein interaction network obtained using STRING (<http://string-db.org/>). Proteins with or without an evident biological connection to the cAMP/cGMP system (**supplemental table 1, yellow and purple**) were submitted to STRING to better understand their biological interaction. In the network, links between proteins signify the various interaction data supporting the network, 5 colored by evidence type as outlined in STRING.

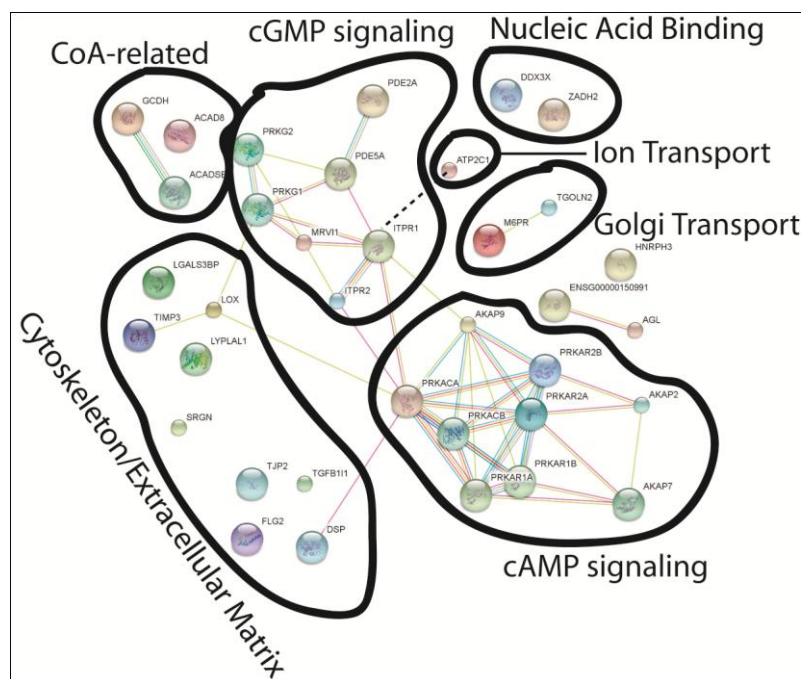

**Supplementary figure 3.** The tandem mass spectrum of the PKA-RII $\alpha$  phosphopeptide (RVpSVCAETYNPDEEEEDTDPR) shows Ser99 to be the site of phosphorylation.

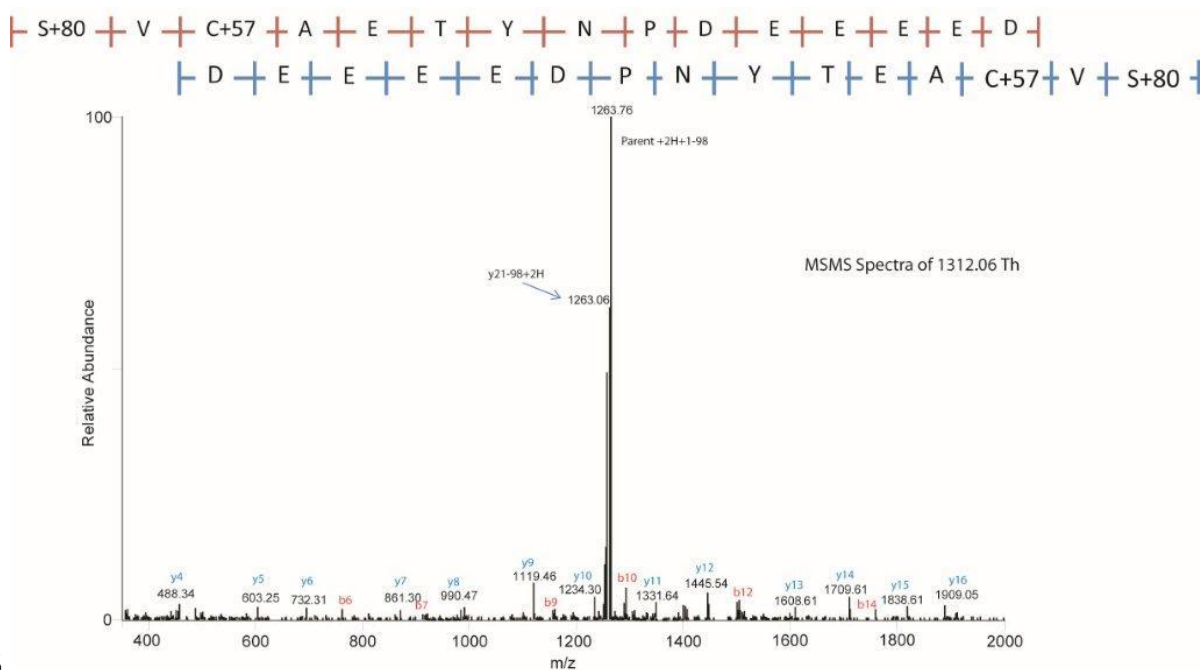

**Supplementary figure 4.** Tandem mass spectrum of the IRAG phosphopeptide (RRVpSVAVVPK) shows Ser670 to be the site of modification.

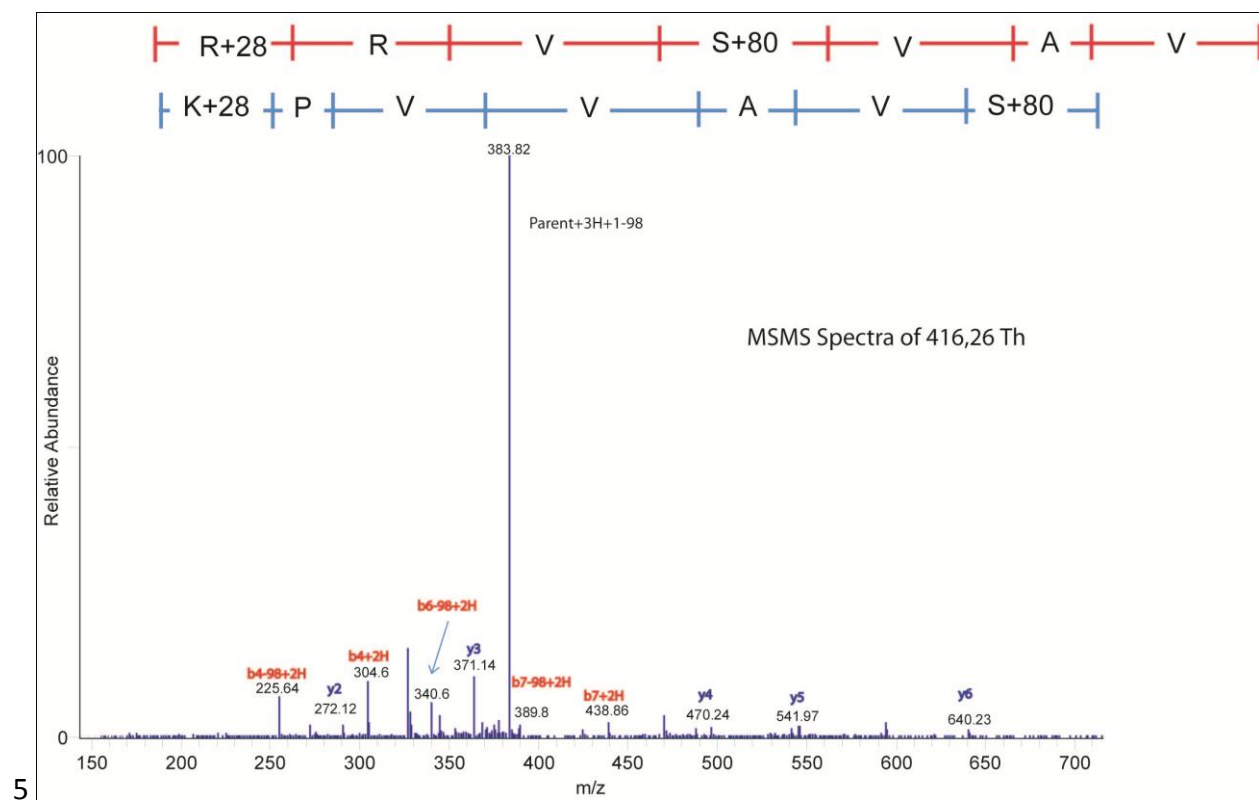

5

10

15

20

25

30
